# Supplementary material
Source: publisher figshare collection journal article supplement (https://gsapubs.figshare.com/ndownloader/files/28309989)
Supplement: Supplementary file 1 [file 28309989]

## Sheet: Blad1
Holm-Alwmark, S., 2021, Impact cratering record of Sweden—A review, in Reimold, W.U.,
and Koeberl, C., eds., Large Meteorite Impacts and Planetary Evolution VI:
Geological Society of America Special Paper 550, https://doi.org/10.1130/2021.2550(01).
TABLE S3. COMPOSITION OF IMPACTITES FROM SILJAN AND TARGET DALA GRANITOIDS FROM SELECTED AUTHORS
Rock type*	Si-1 impact melt rock from dike	Si-2 Granitoid with breccia veinlets	Si-3 Melt breccia	Si-4 Clast-rich melt-bearing impact breccia	Si-5 Clast-rich melt breccia	Si-6 Melt-dikelet	Pseudotachylitic breccia (PTB)	PTB	PTB	Avg. Järna granitoids	Avg. Siljan granites
Reference	Reimold et al. (2005)	Reimold et al. (2005)	Reimold et al. (2005)	Reimold et al. (2005)	Reimold et al. (2005)	Reimold et al. (2005)	Reimold et al. (2015)	Reimold et al. (2015)	Reimold et al. (2015)	Ahl et al. (1999)	Ahl et al. (1999)
wt.%
SiO2	54.06	54.38	59.46	63.83	61.46	55.85	46.22	38.32	41.9	63.43	75.27
TiO2	1.76	0.11	0.68	0.9	0.56	1.4	1.74	6.17	3.52	0.63	0.15
Al2O3	14.9	4.64	16.81	13.68	16.87	16.26	15.3	14.51	15.84	16.42	12.85
Fe2O3†	9.13	2.67	5.17	5.69	3.86	8.48	12.78	13.36	13.8	4.95	1.69
MnO	0.18	0.14	0.05	0.09	0.03	0.16	0.34	0.29	0.32	0.09	0.04
MgO	3.53	0.33	1.15	1.41	0.47	3.97	6.03	6.23	6.6	1.67	0.16
CaO	4.04	12.18	1.3	1.94	0.95	2.24	8.29	11.44	8.78	3.57	0.68
Na2O	2.87	0.99	3.12	2.61	1.99	4.88	1.82	0.91	1.23	3.6	3.57
K2O	6.22	3.55	9.26	6.99	11.48	2.31	2.27	1.22	2.81	4.26	4.94
P2O5	0.34	1.44	0.18	0.19	0.1	0.27	N.d.§	N.d.	N.d.	0.21	0.03
total	99.69	90.1	99.26	98.91	99.09	99.62	94.79	92.45	94.79	100	99.87
LOI	2.66	9.67	2.08	1.58	1.32	2.8	-	-	-	1.19	0.49
ppm
Be	-	-	-	-	-	-	-	-	-	1.6	4.15
F	-	-	-	-	-	-	-	-	-	1001	1749
Sc	14.3	0.9	7.09	12.7	11.4	12.4	-	-	-	9.1	2.93
V	121	11	43	72	15	116	-	-	-	68	15
Cr	19.8	25.1	12.9	24.5	6.1	16.5	-	-	-	29.4	19.5
Co	23.3	10.7	4.04	8.51	1.56	15	-	-	-	12.3	7.3
Ni	20	50	12	20	10	28	-	-	-	13.5	11.63
Cu	13	186	24	26	8	14	-	-	-	18.6	9.87
Zn	350	58100	87	75	178	150	-	-	-	67	40
Ga	-	-	-	-	-	-	-	-	-	20.5	20.6
As	0.15	20	0.2	0.25	0.5	1.05	-	-	-	-	-
Se	0.15	0.27	0.65	0.3	0.6	0.5	-	-	-	-	-
Br	0.3	3.2	0.3	1.5	0.5	0.4	-	-	-	-	-
Rb	167	156	196	296	348	105	-	-	-	134	256
Sr	410	233	357	295	206	386	-	-	-	487	62
Y	37	63	46	45	43	39	-	-	-	28	44
Zr	290	90	570	280	555	300	-	-	-	235	157
Nb	18	<3	23	23	25	21	-	-	-	11.9	21.5
Sn	-	-	-	-	-	-	-	-	-	<6	16.4
Sb	0.05	6.49	0.04	0.13	0.06	0.17	-	-	-	-	-
Cs	1.12	1.78	1.42	7.7	2.46	1.09	-	-	-	-	-
Ba	830	720	1420	1650	690	520	-	-	-	1074	211
La	77.5	36.9	90.2	160	365	46.2	-	-	-	-	-
Ce	98.8	86.1	118	253	466	91.8	-	-	-	-	-
Nd	49.1	45.8	60.3	95.5	247	45.6	-	-	-	-	-
Sm	8.48	10.2	8.02	11.7	25.8	7.81	-	-	-	-	-
Eu	2.03	1.38	1.58	1.57	2.06	1.26	-	-	-	-	-
Gd	6.85	8.11	6.45	8.6	14.7	7.27	-	-	-	-	-
Tb	1.01	1.26	0.85	1.1	1.81	0.94	-	-	-	-	-
Tm	0.49	0.49	0.44	0.61	0.92	0.54	-	-	-	-	-
Yb	3.02	2.63	3.21	4.02	5.74	3.97	-	-	-	-	-
Lu	0.47	0.35	0.5	0.67	0.88	0.62	-	-	-	-	-
Hf	6.61	0.71	11	7.67	13.8	8.32	-	-	-	-	-
Ta	0.62	0.3	0.34	1.01	0.65	0.94	-	-	-	-	-
W	0.2	0.2	0.1	0.7	1.4	0.5	-	-	-	24	23
Ir (ppb)	<0.6	<0.8	<0.3	<0.2	<0.4	<0.6	-	-	-	-	-
Au (ppb)	0.3	<0.5	0.2	12.5	2.1	2.5	-	-	-	-	-
Th	4.59	3.15	6.02	40.2	15.5	13.7	-	-	-	-	-
U	0.71	3.03	1.34	3.23	1.72	2.49	-	-	-	-	-
For methods and errors, see original publications.
*For more details on impactite descriptions/names see references.
†Total Fe expressed as Fe2O3
§N.d. = none detected.
